# Supplementary material for: First principles calculations on lithium diffusion near the surface and in the bulk of Fe-doped LiCoPO4
Source: Royal Society of Chemistry journal article supplement (doi:10.1039/d1cp04517b), 2021-12-07
Supplement: d1cp04517b1.pdf [file d1cp04517b1.pdf]

**Supporting Information**

**First Principles Calculations on Lithium Diffusion  
near Surface and in Bulk of Fe-doped  $\text{LiCoPO}_4$**

Kuan-Ching Wu, *Chieh-Ming Hsieh\**, and *Bor Kae Chang\**

*Department of Chemical and Materials Engineering, National Central University, Taoyuan City,  
Taiwan*

\*Corresponding Author: [hsiehcm@ncu.edu.tw](mailto:hsiehcm@ncu.edu.tw), [BKChang@ncu.edu.tw](mailto:BKChang@ncu.edu.tw)

List of Figures.

Figure S1. Optimized bulk structure of  $\text{LiCoPO}_4$  and possible termination planes for (a) (1 0 0), (b) (0 1 0), and (c) (0 0 1) surfaces. ....4

Figure S2. Supercell structure of Fe doped  $\text{LiCoPO}_4$  after geometry optimization with (a) aggregated and (b) separated distribution of iron atoms. ....5

Figure S3. Slab model with layers sufficiently thick for converged surface energy in (1 0 0), (0 1 0) and (0 0 1) orientation. The grey part at the bottom represents fixed atoms in bulk configuration and 10 Å vacuum layer. ....6

Figure S4. Two types of surface models with the same Fe doping concentration as bulk material. ( $\text{Li}_{136}\text{Fe}_8\text{Co}_{28}\text{P}_{36}\text{O}_{144}$ ) .....7

Figure S5. (a) Diffusion pathways of Li ion-polaron complex along the [0 1 0] direction. Blue, green and red spheres illustrate the trajectories of parallel, crossing and single diffusion processes, respectively. Arrows and circle indicate the direction of polaron hopping or stationary location for each EDP. (b) The corresponding activation energies for crossing (C), single (S), and parallel (P) elementary diffusion processes plotted in green, red, and blue, respectively. ....8

List of Table.

**Table S1.** Energy per atom for systems with different iron distribution.....9

**Table S2.** Average bond length and polyhedral volumes of the  $\text{CoO}_6$  and  $\text{FeO}_6$  octahedral structures at five Fe doping sites. ....9

**Table S3.** Energy of the possible termination planes of low index surfaces. ....10

**Table S4.** Calculated results for low index surfaces. ....10

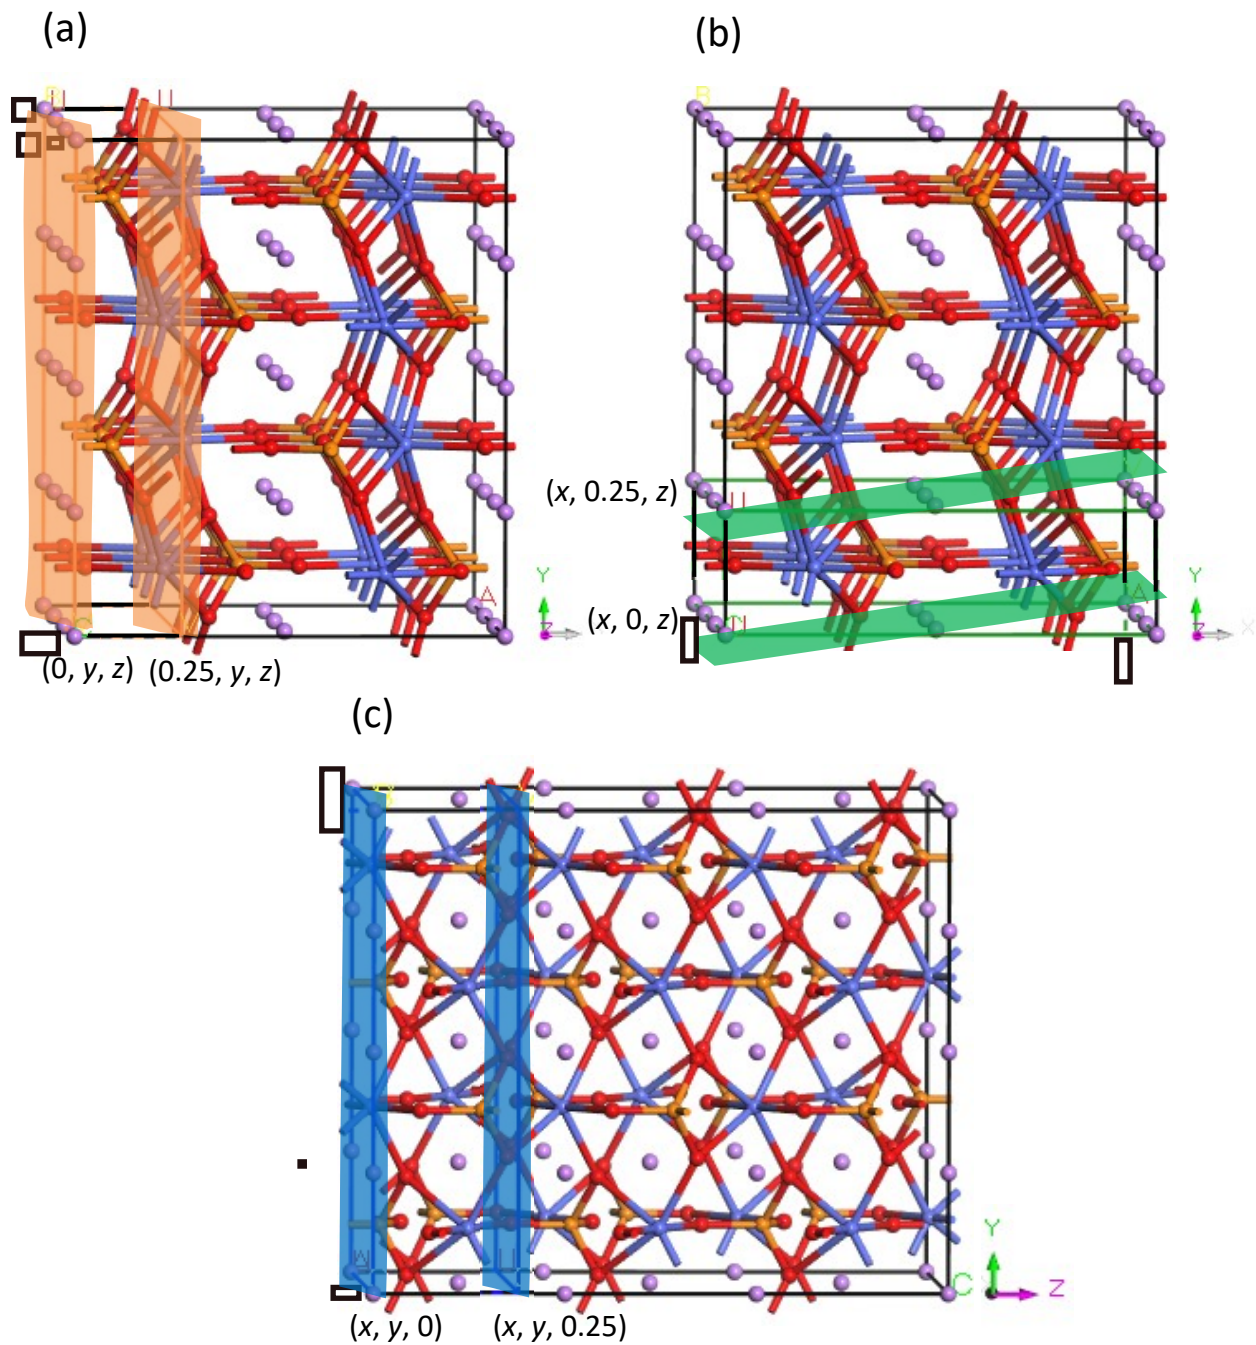

**Figure S1.** Optimized bulk structure of  $\text{LiCoPO}_4$  and possible termination planes for (a)  $(1\ 0\ 0)$ , (b)  $(0\ 1\ 0)$ , and (c)  $(0\ 0\ 1)$  surfaces.

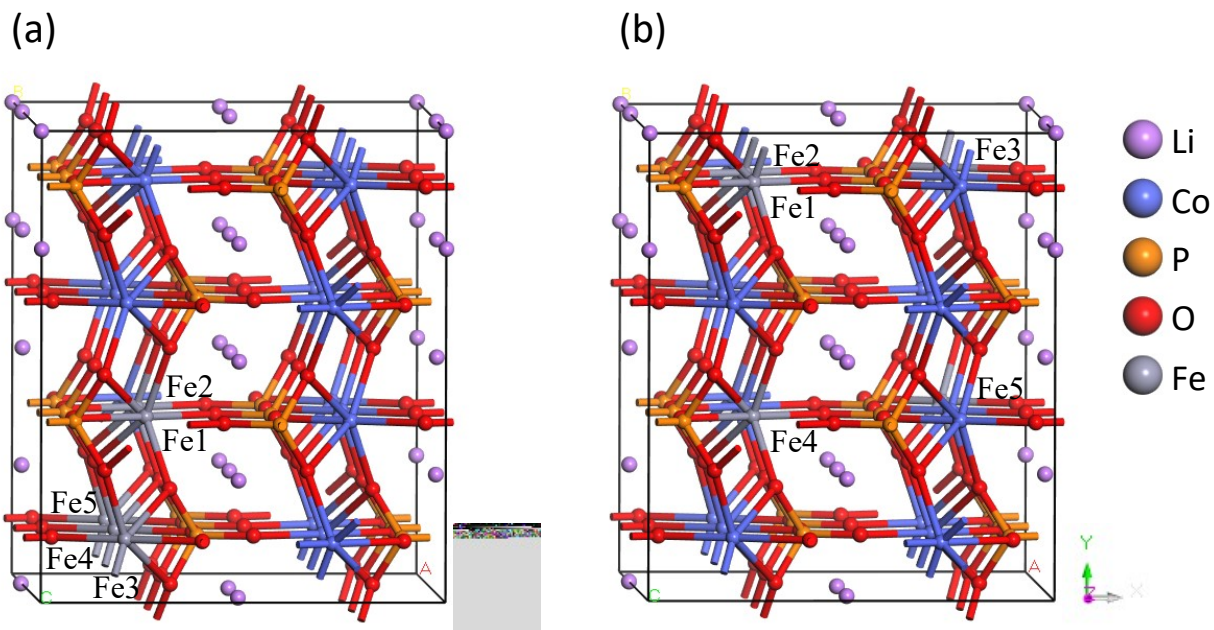

**Figure S2.** Supercell structure of Fe doped  $\text{LiCoPO}_4$  after geometry optimization with (a) aggregated and (b) separated distribution of iron atoms.

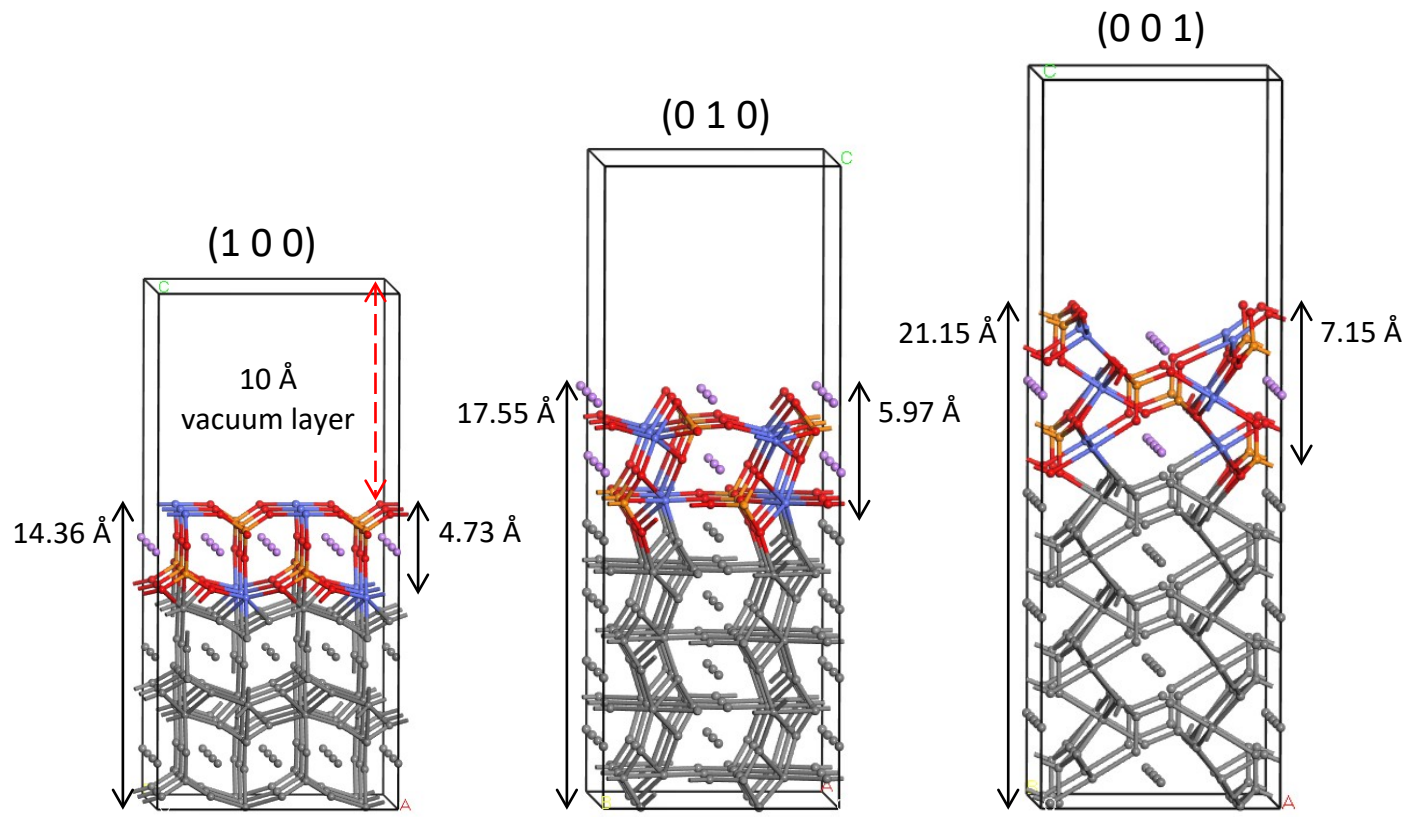

**Figure S3.** Slab model with layers sufficiently thick for converged surface energy in (1 0 0), (0 1 0) and (0 0 1) orientation. The grey part at the bottom represents fixed atoms in bulk configuration and 10 Å vacuum layer.

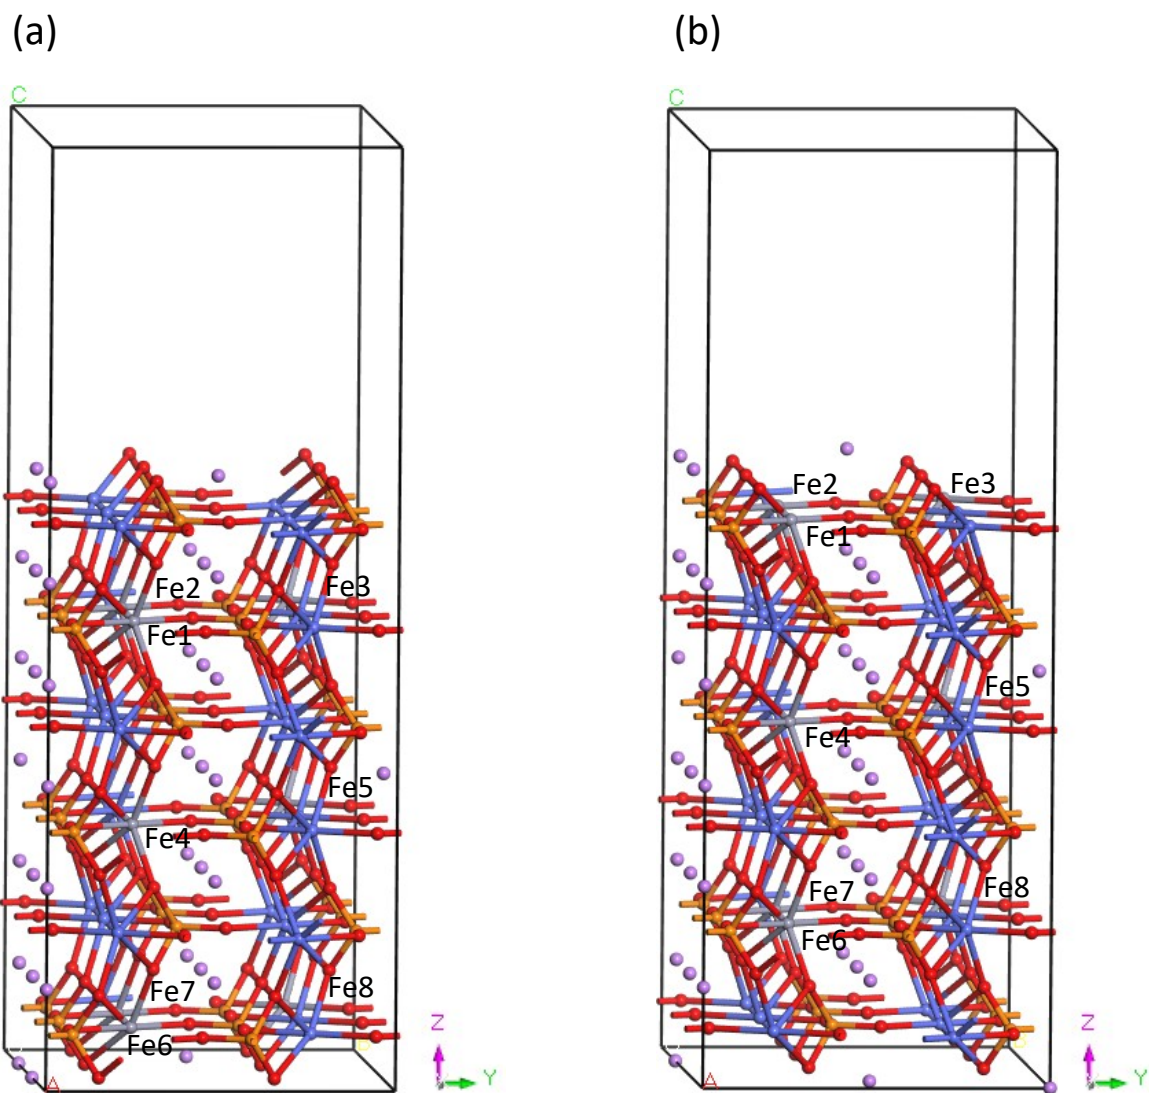

**Figure S4.** Two types of surface models with the same Fe doping concentration as bulk material.

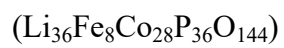

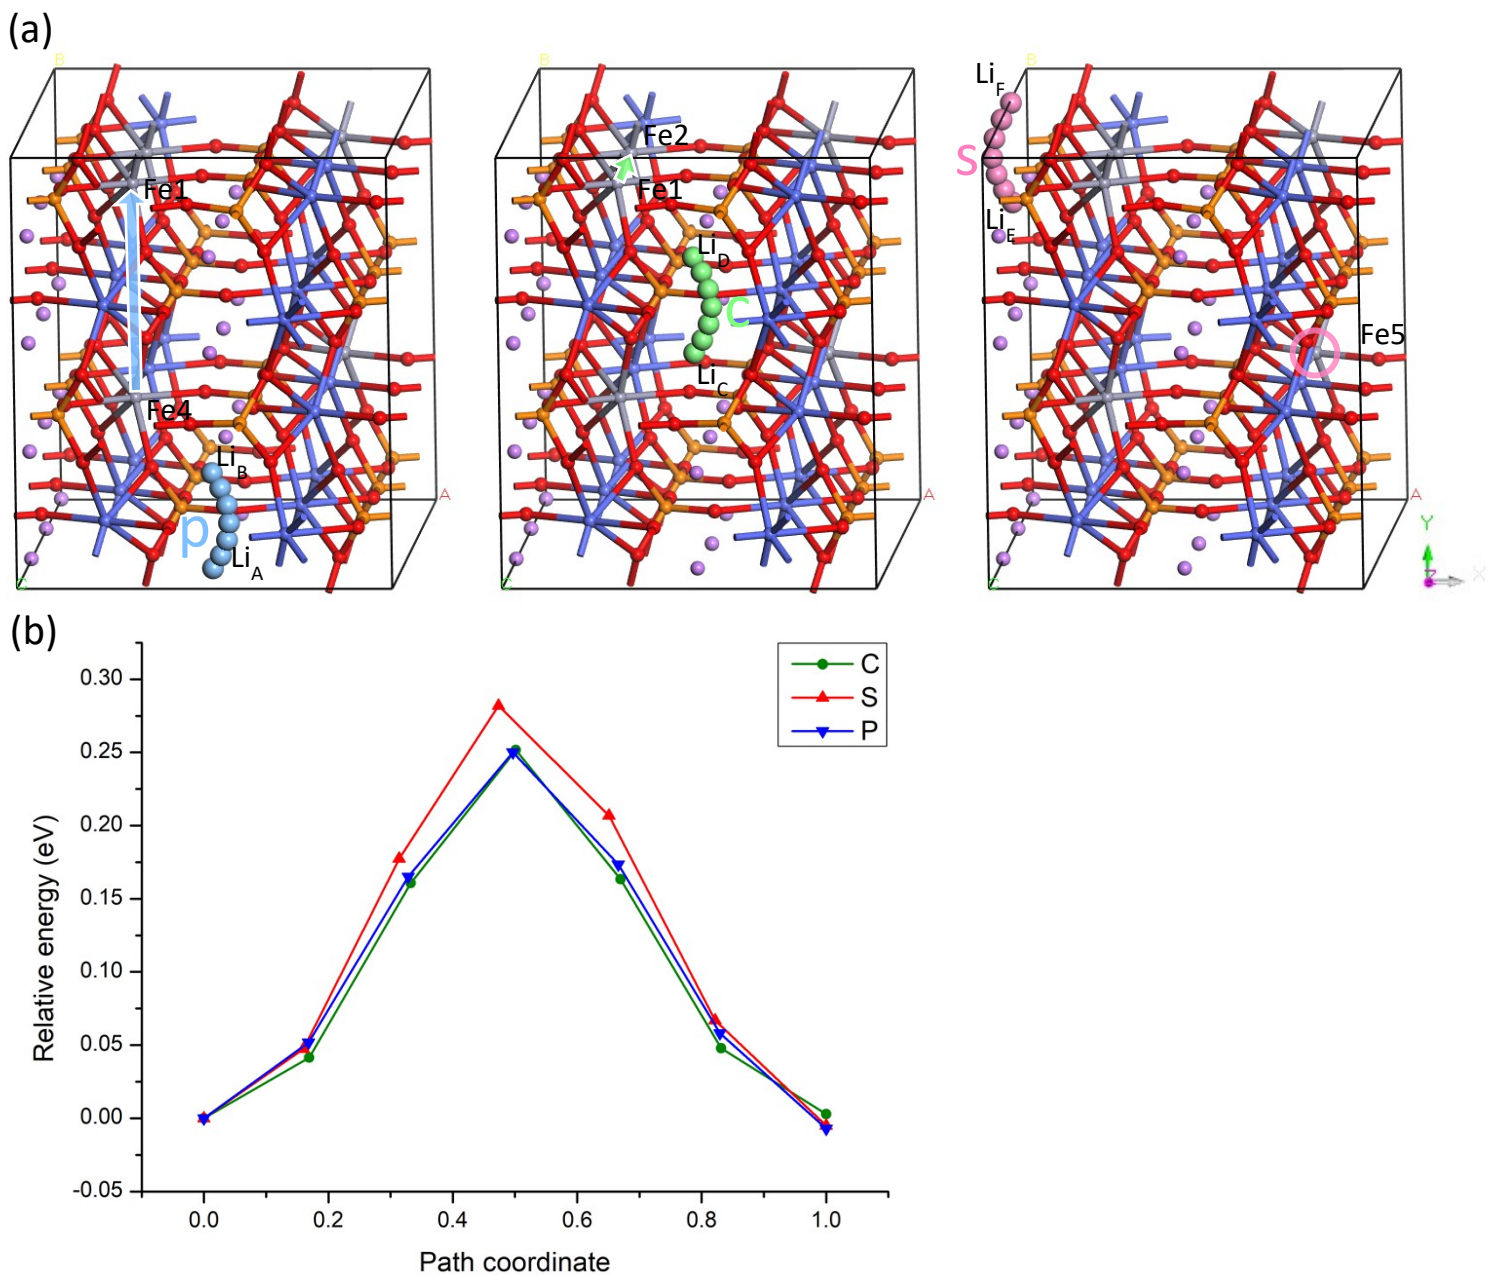

**Figure S5.** (a) Diffusion pathways of Li ion-polaron complex along the [0 1 0] direction. Blue, green and red spheres illustrate the trajectories of parallel, crossing and single diffusion processes, respectively. Arrows and circle indicate the direction of polaron hopping or stationary location for each EDP. (b) The corresponding activation energies for crossing (C), single (S), and parallel (P) elementary diffusion processes plotted in green, red, and blue, respectively.



**Table S1.** Energy per atom for systems with different iron distribution.

| Distribution | Doped Fe-Fe Average Distance (Å) | Energy/Atom (eV) |
|--------------|----------------------------------|------------------|
| Aggregated   | 5.01                             | -446.6976936     |
| Separated    | 7.59                             | -446.6987315     |

**Table S2.** Average bond length and polyhedral volumes of the CoO<sub>6</sub> and FeO<sub>6</sub> octahedral structures at five Fe doping sites.

| Bond                               | Co1-O  | Fe1-O  | Co2-O  | Fe2-O  | Co3-O  | Fe3-O  | Co4-O  | Fe4-O  | Co5-O  | Fe5-O  |
|------------------------------------|--------|--------|--------|--------|--------|--------|--------|--------|--------|--------|
| Average Bond Length (Å)            | 2.159  | 2.187  | 2.143  | 2.188  | 2.145  | 2.185  | 2.144  | 2.187  | 2.144  | 2.186  |
| Polyhedra Volume (Å <sup>3</sup> ) | 12.388 | 13.064 | 12.372 | 13.077 | 12.414 | 13.018 | 12.387 | 13.022 | 12.412 | 13.053 |
| Bond Length Difference (%)         |        | 1.305  |        | 2.116  |        | 1.896  |        | 2.006  |        | 1.935  |
| Volume Difference (%)              |        | 5.461  |        | 5.696  |        | 4.865  |        | 5.119  |        | 5.161  |

**Table S3.** Energy of the possible termination planes of low index surfaces.

| Orientation | Termination Plane | Energy (eV)  | Energy/Atom (eV) |
|-------------|-------------------|--------------|------------------|
| [1 0 0]     | (0, 0, 0)         | -113871.9751 | -451.8729        |
|             | (0.25, 0, 0)      | -113913.6530 | -452.0383        |
| [0 1 0]     | (0, 0, 0)         | -113921.9886 | -452.0714        |
|             | (0, 0.25, 0)      | -113921.9851 | -452.0714        |
| [0 0 1]     | (0, 0, 0)         | -113900.9675 | -451.9880        |
|             | (0, 0, 0.25)      | -113916.0629 | -452.0479        |

**Table S4.** Calculated results for low index surfaces.

| Orientation | Slab Thickness (Å) | Relaxation Layer Thickness (Å) | Surface Energy (J/m <sup>2</sup> ) |
|-------------|--------------------|--------------------------------|------------------------------------|
| [1 0 0]     | 14.36              | 4.73                           | 0.697                              |
| [0 1 0]     | 17.55              | 5.97                           | 0.689                              |
| [0 0 1]     | 21.15              | 7.15                           | 1.036                              |
